# Supplementary material
Source: publisher figshare collection journal article supplement (https://sage.figshare.com/ndownloader/files/31724232)

**Table 1. Underlying Principles of Inuit Wellness Approaches.**

| 1. **Support individual and collective self-determination** | - Trust that change comes from the communities themselves - Support Inuit ways of knowing and doing in formal and informal contexts - Recognize the contribution of every community members for collective wellbeing - Take small actions towards change - When desired, use the support of non-Inuit, who remain within support roles rather than decision-making roles |
| --- | --- |
| 1. **Enhance individual and collective strength and confidence** | - Focus on strengths of individuals, families and community - Strengthen confidence in oneself, self-esteem and a feeling of pride - Recognize the value of each and every person - Use encouraging and positive approaches - Focus on listening and being present for others - Respect everyone's pace - Support the potential of every child - Act in the best interest of the community and of future generations |
| **3. Focus on the interconnection between family and community members, and the land** | - Place traditional Inuit values at the center of approaches - Enhance intergenerational support - Strengthen family and community connections - Strengthen connections to the land - Focus on building relationships in informal settings - Support people in their roles as family members and community members (women, men, parents, youth, Elders, etc.) - Share knowledge about family and community roles and their importance |

**Figure 1. Wellness: the intersection of multiple approaches**


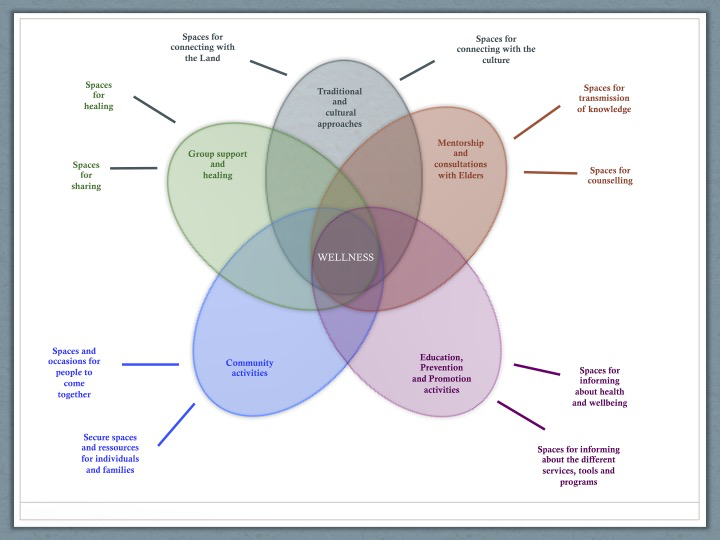

Supplement: Supplementary file 1 [file 31724232]
